1 **Title: The evolution, distribution and diversity and of endogenous circoviral**  
2 **elements.**

3

4 **Running title: Endogenous circoviral elements**

5

6 **Authors:** Tristan P.W. Dennis<sup>1\*</sup>, William Marciel de Souza<sup>1,2\*</sup>, Soledad Marsile-  
7 Medun<sup>1,3</sup>, Joshua B. Singer<sup>1</sup>, Sam J. Wilson<sup>1</sup>, and Robert J. Gifford

8

9 **Affiliations:**

10 1. MRC-University of Glasgow Centre for Virus Research, 464 Bearsden Road,  
11 Glasgow, UK

12 2. Virology Research Center, School of Medicine of Ribeirão Preto of University  
13 of São Paulo, Ribeirão Preto, Brazil

14 3. Agrocampus Ouest, 65 Rue de Saint-Brieuc, 35000 Rennes, France

15

16 **Corresponding author:**

17

18 Robert J. Gifford,

19 MRC-University of Glasgow Centre for Virus Research,

20 Bearsden,

21 Glasgow, UK.

22 e-mail: [robert.gifford@glasgow.ac.uk](mailto:robert.gifford@glasgow.ac.uk)

23

1 **Abstract**

2           Circoviruses (family *Circoviridae*) are small, non-enveloped viruses that have  
3 short, single-stranded DNA genomes. Circovirus sequences are frequently recovered  
4 in metagenomic investigations, indicating that these viruses are widespread, yet they  
5 remain relatively poorly understood. Endogenous circoviral elements (CVe) are DNA  
6 sequences derived from circoviruses that occur in vertebrate genomes. CVe can  
7 provide unique, retrospective information about the biology and evolution of  
8 circoviruses. In this study, we screened 362 vertebrate genome assemblies *in silico*  
9 to generate a catalog of CVe loci. We identified a total of 179 CVe sequences, most  
10 of which have not been reported previously. We show that these CVe loci reflect at  
11 least 19 distinct germline integration events. We determine the structure of CVe loci,  
12 identifying some that show evidence of potential functionalization. We also identify  
13 orthologous copies of CVe in snakes, fish, birds, and mammals, allowing us to add  
14 new calibrations to the timeline of circovirus evolution. Finally, we observed that  
15 some ancient CVe group robustly with contemporary circoviruses in phylogenies,  
16 with all sequences within these groups being derived from the same host class or  
17 order, implying a hitherto underappreciated stability in circovirus-host relationships.  
18 The openly available dataset constructed in this investigation provides new insights  
19 into circovirus evolution, and can be used to facilitate further studies of circoviruses  
20 and CVe.

21

22 **Keywords:** Circovirus; Evolution; Endogenous; Paleovirology; Taxonomy;  
23 Phylogeny;

24

25 **Abbreviations:**

26 CVe = endogenous circoviral element

27 ORF = open reading frame

28 Cap = Capsid

29 Rep = Replicase

30 ssDNA = single-stranded DNA

## 1 **1. Introduction**

2           Circoviruses (family *Circoviridae*, genus *Circovirus*) are small, non-enveloped  
3 viruses with single-stranded DNA (ssDNA) genomes. Circovirus genomes are  
4 typically ~2 kilobases (kb) in length and contain only two open reading frames  
5 (ORFs): one encoding a non-structural replicase (Rep) protein, and a second  
6 encoding the viral capsid (Cap). The family contains two genera: *Circovirus* and  
7 *Cyclovirus* [1]. Over recent years, sequencing-based virus discovery efforts have  
8 identified many new members of these two genera [2]. However, little or nothing is  
9 known about most of the novel viruses that have been identified using these  
10 approaches. Only a handful of circoviruses have been investigated at a level beyond  
11 sequencing: porcine circoviruses 1 and 2 (PCV-1 and PCV-2), which infect swine,  
12 and beak and feather disease virus (BFDV), which infects various avian species [3].

13           Circovirus sequences are frequently recovered from tissue and environmental  
14 samples in metagenomic investigations, indicating that these viruses are widespread,  
15 yet they remain relatively poorly understood [4]. Endogenous circoviruses (CVe)  
16 provide an unconventional but useful source of information about circovirus  
17 distribution, diversity and evolution. These sequences are derived from the genomes  
18 of circoviruses that circulated millions of years ago, and became integrated into the  
19 host germline [5, 6]. Relatively robust minimum age estimates can be obtained for  
20 CVe via the identification of orthologous copies in distinct host lineages. On this  
21 basis, we now know that the association between circoviruses and vertebrates  
22 extends back millions of years before the present day [7, 8].

23           In this study, we screened vertebrate genomes *in silico* to generate a  
24 comprehensive catalog of CVe. We used these data to: (i) extract information about  
25 the long-term evolution of circoviruses; (ii) generate an openly accessible data  
26 resource that can facilitate the further investigation of CVe and circoviruses.

27

## 28 **2. Material & Methods**

### 29 2.1. Identification and analysis of CVe sequences

30           We used similarity searches to systematically screen genome assemblies of  
31 362 chordate species (**Table S1**) for sequences homologous to circovirus proteins.  
32 Vertebrate genome assemblies and circovirus reference genomes were obtained  
33 from the NCBI genomes resource. Screening *in silico* was performed using the  
34 database-integrated genome-screening tool. The DIGS procedure used to identify  
35 CVe comprises two steps. In the first, a circovirus probe sequence (e.g. a Cap or  
36 Rep protein sequence) is used to search a particular genome assembly file using the  
37 basic local alignment search tool (BLAST) program [9]. In the second, sequences

1 that produce statistically significant matches to the probe are extracted and classified  
2 by BLAST-based comparison to a set of virus reference genomes (see **Table S2**).  
3 Results are captured in a MySQL database.

4 We inferred the ancestral ORFs of C<sub>Ve</sub> (and the number of stop codons and  
5 frameshifts interrupting these ORFs) via a combination of automated alignment and  
6 manual adjustment. Multiple sequence alignments were constructed using MUSCLE  
7 [10] and PAL2NAL [11]. Manual inspection and adjustment of alignments was  
8 performed in Se-AL [12]. Phylogenies were constructed using maximum likelihood as  
9 implemented in RaxML [13], and the VT protein substitution model [14] as selected  
10 using ProTest [15].

11

## 12 2.2. Construction of C<sub>Ve</sub> sequence data resource.

13 We used GLUE - an open, data-centric software environment specialized in  
14 capturing and processing virus genome sequence datasets – to collate the  
15 sequences, alignments and associated data used in this investigation. The aim was  
16 to create a standardized data C<sub>Ve</sub> resource that would be openly accessible, and  
17 would facilitate the further use and development of the dataset assembled here. The  
18 project includes all the C<sub>Ve</sub> identified by our *in silico* screen, as well as a set of  
19 representative reference sequences for the *Circovirus* genus (**Table S2**). All of these  
20 sequences are linked to the appropriate auxiliary data; for the virus sequences, this  
21 includes information about the sample from which the sequence was obtained; for  
22 C<sub>Ve</sub>, it includes the name of genome assembly and contig in which the C<sub>Ve</sub>  
23 sequence was identified, and its coordinates and orientation within that contig.

24 The project also includes the key alignments constructed in this study, linked  
25 together using the GLUE ‘alignment tree’ data structure. These include: (i) ‘tip’  
26 alignments in which all taxa are C<sub>Ve</sub> that are known or putative orthologs of one  
27 another; (ii) a ‘root’ alignment constructed to represent proposed homologies  
28 between the genomes of representative viruses in the genus *Circovirus* and the C<sub>Ve</sub>  
29 recovered by our screen. Because each of these alignments is constrained to a  
30 standard reference sequence, alignments are linked to one another.

31 We applied a systematic approach to naming C<sub>Ve</sub>. Each element was  
32 assigned a unique identifier (ID) constructed from a defined set of components. The  
33 first component is the classifier ‘C<sub>Ve</sub>’. The second is a composite of two distinct  
34 subcomponents separated by a period: the name of C<sub>Ve</sub> group (usually derived from  
35 the host group in which the element occurs in (e.g. Carnivora), and the second is a  
36 numeric ID that uniquely identifies the insertion. Orthologous copies in different  
37 species are given the same number, but are differentiated using the third component

1 of the ID that uniquely identifies the species from which the sequence was obtained.  
2 An additional unique numeric ID may be added to this component in cases where a  
3 Cve element has expanded via duplication.

4

### 5 **3. Results**

#### 6 3.1. Identification and phylogenetic analysis of vertebrate Cve

7 We systematically screened 362 vertebrate genome assemblies for Cve, and  
8 identified a total of 179 Cve sequences (**Table S3**), in 52 distinct species (**Table 2**).  
9 For each Cve sequence, we determined the regions of the circovirus genome  
10 represented, and attempted to identify genomic flanks. Where genomic flanks were  
11 present, we compared these with one another to identify potentially orthologous Cve  
12 loci. In several cases, it was not possible to determine whether multiple Cve loci  
13 within the same species (or group of closely-related species) represented the  
14 outcome of distinct incorporation events, or the fragmented remains of a single,  
15 ancestrally acquired element. The main causes of uncertainty were; (i) lack of  
16 flanking sequences due to short contig length, or undetermined DNA sequences  
17 flanking Cve, and; (ii) the presence of multiple Cve that spanned non-overlapping  
18 regions of the circovirus genome. Since Cve are comparatively rare in vertebrate  
19 genomes [7, 16], we conservatively assumed a single incorporation event had taken  
20 place except in cases where it could be demonstrated otherwise. On this basis, we  
21 estimate that the 179 Cve identified here represent at least 19-26 distinct germline  
22 incorporation events (**Table 1, Table 2, Figure 1**), depending on whether Cve in ray-  
23 finned fish are taken to represent a single incorporation event, or seven distinct  
24 incorporation events, each in a different order (see **section 3.3**). The large  
25 discrepancy between the number of elements versus the number of events reflects  
26 the fact that 101 of the 179 Cve identified in our study (57%) belong to a group of  
27 highly duplicated Cve loci in carnivore genomes, all of which derive from a single  
28 germline incorporation event.

29 We only identified four cases where Cve encoding both *rep* and *cap* were  
30 present in the same species or species group. In most, only *rep*-derived sequences  
31 appear to have been incorporated/retained, and in one case only *cap* (**Table 1**). We  
32 constructed a multiple sequence alignment (MSA) that spanned the entire circovirus  
33 genome and contained both reference sequences for Cve (these could be based on  
34 individual loci, or a consensus), and representative circovirus reference taxa (**Table**  
35 **S2**). We used this 'root' MSA (see **section 2.2**) to infer which regions of the  
36 circovirus genome had been incorporated as Cve. Where Cve spanned coding  
37 sequence, we inferred the putative ancestral reading frame by comparing Cve and

1 circovirus sequences, and attempting to identify likely frameshifting mutations. Most  
2 Cve represent only fragments of the genome (**Figure 1**), and many are relatively  
3 degraded, containing multiple frameshifting indels and stop codons.

4         Where we identified several Cve from the same species, we compared  
5 genomic regions to search for evidence of homology and thereby identify orthologs.  
6 Where we were able to identify orthologous Cve insertions, we used these data to  
7 create a timeline of circovirus evolution (**Figure 2**). In addition, we identified sets of  
8 ‘potentially orthologous’ Cve, where sequence similarity and phylogenetic  
9 relationships were consistent with orthology, but this could not be confirmed or ruled  
10 out based on flanking sequences.

11         A range of distinct partitions were derived from the virtually translated root  
12 MSA (with frameshifts removed), and used to construct bootstrapped ML phylogenies  
13 (**Figure 3**). In general, support for the deeper branching relationships between Cve  
14 and circoviruses was weak, irrespective of which genomic region was used to  
15 construct trees. This reflects the fact that most Cve are short and/or highly degraded,  
16 and these sequences tend to group distantly from other taxa. However, in  
17 phylogenies based on Rep (**Figure 3**), several robustly supported subgroupings were  
18 observed, three of which – referred to here as mammal 1, cyprinid 1, and avian 1 -  
19 included a mixture of Cve and contemporary circoviruses. Notably, in all three of  
20 these clades, Cve and circovirus sequences were obtained from the same hosts of  
21 the same taxonomic class. The sections that follow describe the distribution and  
22 diversity of Cve within individual classes in the subphylum Vertebrata (chordates with  
23 backbones).

24

### 25 3.2. Cve in jawless vertebrates

26         Extant vertebrates are divided into the jawed vertebrates (Gnathostomata)  
27 and jawless vertebrates (Agnatha). The Agnatha represent the most basal group of  
28 vertebrates and includes the hagfishes (myxinooids) and lampreys (petromyzontids).  
29 We identified seven sequences exhibiting homology to *rep* in the genome assembly  
30 of the inshore hagfish (*Eptatretus burgeri*). These sequences are relatively distinct  
31 from other circoviruses, and also showed relatively high genetic diversity relative to  
32 one another, forming three distinct groups in phylogenetic trees (**Figure S1**). Notably,  
33 the putative Rep polypeptides encoded by these sequences contained several in-  
34 frame indels relative to one another. Because such a pattern of variation is unlikely to  
35 arise through neutral accumulation of mutations in the germline, this suggests the  
36 occurrence of at least three distinct genome incorporation events, each involving  
37 distinct, but relatively closely related viruses. However, since we were unable to

1 identify unambiguous genomic flanking sequences for any of these loci, their  
2 classification as C<sub>Ve</sub> should for now be considered tentative.

3

### 4 3.3. C<sub>Ve</sub> in ray-finned fish (class Actinopterygii)

5       Circoviruses are thought to infect barbel fish (*Barbus barbus*) and European  
6 catfish (*Silurus glanis*), based on (i) the observation of viral particles in tissues, and  
7 the recovery of circovirus sequences from these tissues via nested PCR [17, 18]. In  
8 addition, C<sub>Ve</sub> have been reported in one fish species - the Indian rohu (*Labeo rohita*)  
9 [19]. We identified numerous additional C<sub>Ve</sub> sequence in the genome assemblies of  
10 ray-finned fishes (Class Actinopterygii) (**Table 2, Table S3**). We established that at  
11 least two of these C<sub>Ve</sub> - occurring in the common carp (*Cyprinus carpio*) and golden-  
12 line barbell (*Sinocyclocheilus grahami*) genomes - were orthologs of one another,  
13 indicating they were incorporated into the germline of cyprinid fish more than 39  
14 million years ago [28, 29]. These C<sub>Ve</sub> were comprised of multiple complete circovirus  
15 genomes arranged in tandem, and intriguingly, were observed C<sub>Ve</sub> group as sister  
16 taxa to barbel circovirus (BarbCV) in phylogenetic trees, sharing ~70% nucleotide  
17 identity (across 1654 nucleotides) with the BarbCV genome.

18       We also identified matches to *rep* in eight other species of ray-finned fish  
19 (**Table 2**). We could not determine with certainty how many integration events these  
20 C<sub>Ve</sub> represented. Interestingly, however, all of these sequences group together in  
21 phylogenies (**Figure 3**), and the phylogeny constructed for these elements - when  
22 rooted on the C<sub>Ve</sub> from the most basal host - the European eel (*Anguilla anguilla*),  
23 approximately follows that of the host species, consistent with a single ancestral  
24 integration event >200 million years ago (**Figure 2**). Alternatively, the C<sub>Ve</sub> observed  
25 in distinct orders might represent distinct incorporation events. This is supported by  
26 the placement of C<sub>Ve</sub>.anura in phylogenies, in which it splits the fish C<sub>Ve</sub> from one  
27 another, albeit with weak support (**Figure S1**). In addition, the observation that C<sub>Ve</sub>  
28 elements in order cypriniforme fish (golden-line barbell and carp) occur as full-length  
29 tandem genomes, whereas those in Perciformes are derived from more divergent  
30 fragments of *rep*, is suggestive of at least two separate incorporation events. Notably  
31 one C<sub>Ve</sub> in the mangrove rivulus (*Kryptolebias marmoratus*) encoded a complete  
32 intact *rep* gene (**Figure 1**) that is predicted to be expressed, suggesting it may have  
33 been functionalized in some manner.

34

### 35 3.4. C<sub>Ve</sub> in amphibians

36       Sequences homologous to circovirus *rep* genes have previously been  
37 identified in the Western clawed frog (*Xenopus tropicalis*) [20]. We identified C<sub>Ve</sub> in

1 the genome of the American bullfrog (*Rana catesbeiana*) that partially overlaps that  
2 identified in *Xenopus*. Potentially, these sequences could be orthologs of one  
3 another, which would imply a minimum age of ~204 MYA [21, 22] (**Figure 2**).  
4 However, we were unable to confirm this based on analysis of flanking genomic  
5 sequences.

6

### 7 3.5. C<sub>Ve</sub> in reptiles

8 A pair of orthologous C<sub>Ve</sub>, each covering about 75% of the circovirus genome,  
9 have previously been recovered from rattlesnake genomes (*Crotalus spp*) [23]. We  
10 identified C<sub>Ve</sub> in four additional snake species (**Table 2**). Examination of aligned  
11 snake C<sub>Ve</sub> sequences indicated that all are likely to be orthologs of those previously  
12 reported in rattlesnakes (see **Figure S2**), implying that this C<sub>Ve</sub> integrated into the  
13 serpentine germline ~72-90 million years ago (Mya) (**Figure 2**).

14

### 15 3.6. C<sub>Ve</sub> in birds (class Aves)

16 C<sub>Ve</sub> have previously been reported in the genomes of several avian species:  
17 the little egret (*Egretta garzetta*), white-throated tinamou (*Tinamus guttatus*), medium  
18 ground-finch (*Geospiza fortis*), and kea (*Nestor notabilis*) [16, 20]. We identified C<sub>Ve</sub>  
19 in eight additional species. Some of these appeared likely to be orthologs of C<sub>Ve</sub>  
20 reported previously. For example, we identified C<sub>Ve</sub> in two species of psittacine bird  
21 that appeared represented orthologs of one another, and possibly of those previously  
22 identified in the kea (*Nestor notabilis*) [16] (**Table 2**), which would imply integration  
23 into the psittacine germline prior to the divergence of the major extant lineages within  
24 the order Psittaciformes (estimated to have occurred 30-60 Mya [13, 24]) (**Figure 2**).

25 We also identified orthologs of the *rep*-derived insertion previously described  
26 in the medium ground finch in several additional species in the avian order  
27 Passeriformes (songbirds) (**Table 2**). Identification of these orthologs demonstrates  
28 that this particular C<sub>Ve</sub> predates the radiation of avian sub-order Passeroidea ~38  
29 Mya [13, 25] (**Figure 2**).

30 In addition to identifying the previously reported C<sub>Ve</sub> in the genomes of the  
31 white-throated tinamou (*Tinamus guttatus*) and little egret (*Egretta garzetta*) [16], we  
32 identified previously unreported C<sub>Ve</sub> in the Japanese rail (*Gallirallus okinawae*: order  
33 Gruiformes) and downy woodpecker (*Picoides pubescens*: order Piciformes) (**Table**  
34 **2**). Both these sequences were relatively short and divergent, and consequently we  
35 could not determine their relationships to other C<sub>Ve</sub> and circoviruses with confidence.

36

### 37 3.6. C<sub>Ve</sub> in mammals (class Mammalia)



1           The majority of C<sub>Ve</sub> identified in our screen were recovered from carnivore  
2 genome assemblies. As far as we are able to discern from phylogenetic and  
3 comparative analysis, all of these C<sub>Ve</sub> derive from a 1-4 germline incorporation  
4 events involving an ancient carnivore *rep* gene. However, the copy number of these  
5 elements has expanded subsequent to their incorporation into the germline, in some  
6 cases quite dramatically. The grouping of carnivore C<sub>Ve</sub> in phylogenies (**Figure 4**)  
7 indicates that at least four C<sub>Ve</sub> insertions were present in the carnivore germline prior  
8 to the divergence of extant families within this order. The copy number of one  
9 particular element (referred to here as C<sub>Ve</sub>-Carnivora-4) has expanded in some  
10 carnivore lineages. As shown in **Figure 4**, the phylogenetic relationships between  
11 duplicates in the group C<sub>Ve</sub>-Carnivora-4 indicate that these expansions have  
12 occurred independently in ursids (bears), pinnipeds (seals and walruses), and  
13 mustelids. C<sub>Ve</sub> in this lineage are flanked by sequences that disclose homology to  
14 non-LTR retrotransposons. Thus, one plausible explanation for the elevated copy  
15 number in certain carnivore lineages is that C<sub>Ve</sub> have become embedded into  
16 retroelements and copied along with these sequences when they undergo  
17 transposition.

18           A novel, relatively well-preserved *rep*-derived C<sub>Ve</sub> was identified in the  
19 genome of the Ryukyu mouse (*Mus caroli*) that grouped closely with circoviruses  
20 genome recovered from dogs [26, 27]. This element presumably arose after this  
21 species diverged from the house mouse (*Mus musculus*) ~6-7 Mya, since it is absent  
22 from this species.

23           In the cape golden mole (*Chrysochloris asiaticus*) matches to both *cap* and  
24 *rep* were identified. However, these occurred on distinct contigs and did not overlap.  
25 Furthermore, both C<sub>Ve</sub> were relatively short and degraded, and were highly  
26 divergent relative to other C<sub>Ve</sub>. C<sub>Ve</sub> derived from *cap* were also identified in the  
27 genome of Hoffmann's two-toed sloth (*Choloepus hoffmanni*) (**Figure 1**).

28           C<sub>Ve</sub> have previously been identified in the genome of the short-tailed  
29 opossum (*Monodelphis domestica*), an American marsupial [7]. In phylogenies based  
30 on *rep*, this sequence groups together with the porcine circoviruses, canine  
31 circovirus, and the C<sub>Ve</sub> we identified in *Mus caroli*. We identified the first examples of  
32 C<sub>Ve</sub> from the genomes of Australian marsupial species: the Tasmanian devil  
33 (*Sarcophilus harrisii*) and the koala (*Phascolarctos cinereus*). Both these sequences  
34 derived from circovirus *rep* genes, and grouped together in phylogenetic trees  
35 (**Figure S1**). However, their placement relative to other taxa was not supported with  
36 confidence, reflecting their short and degraded nature. Several other short and  
37 degraded matches to Rep probes were identified in other mammalian species (**Table**

1 **1, Table 2, Figure 1**). These sequences were relatively distantly related to one  
2 another and to contemporary circoviruses.

3

#### 4 **4. Discussion**

##### 5 4.1. CVe provide retrospective information about circovirus evolution.

6 In this study, we recovered CVe from published vertebrate genomes,  
7 determined their genomic structures, and examined their phylogenetic relationships  
8 to contemporary circoviruses. Our analysis is the first to examine such a large set of  
9 CVe sequences, and to screen so widely within vertebrates. We show that CVe are  
10 relatively widespread in vertebrate genomes, though it appears they are absent from  
11 some lineages (e.g. primates, in which genome coverage is relatively high).

12 Several of the CVe loci identified here have been reported previously [7, 16,  
13 19, 20], and the majority of novel CVe sequences recovered by our screen were  
14 orthologs or duplicates of these loci. Nevertheless, we identified 17 CVe loci that  
15 have not been reported before (**Table 1, Table S3**). These sequences provide the  
16 first evidence of (ancestral) circovirus infection for several species (**Table 2**). In  
17 addition, the identification and characterisation of novel orthologs allowed us to  
18 establish the first minimum age estimates for some CVe loci, and to markedly  
19 extended those of others. Thus, we were able to derive a more accurately calibrated  
20 timeline of evolution for the *Circovirus* genus, spanning multiple geological eras  
21 (**Figure 2**). Furthermore, we observed that CVe in fish, birds and mammals cluster  
22 phylogenetically with exogenous circoviruses identified from the same host class.  
23 This implies that there is a stability to the relationship between circovirus and host  
24 relationships, at least at higher taxonomic levels.

25

##### 26 4.1. Impact of CVe on host genome evolution

27 The majority of CVe are derived from *rep* genes. To the extent that CVe have  
28 been exapted or co-opted, the predominance of CVe derived from *rep* might reflect  
29 that these sequences are more readily functionalised than those derived from *cap*.  
30 Furthermore, we identified one sequence. Notably one CVe in the mangrove rivulus  
31 (*Kryptolebias marmoratus*) encoded an intact *rep* gene that is predicted to express  
32 mRNA, suggesting it may have been functionalized in some manner (**Figure 1**).

33 Notably, several examples have now been described of endogenous viral  
34 elements (EVEs) that are derived from replicase genes, are expressed, and encode  
35 intact ORFs [7, 30, 31]. These elements are derived from a range of different viruses,  
36 and have clearly arisen in distinct events, suggesting there might be a common  
37 mechanism causing EVEs derived from the replicases of distinct viruses to be

1 selected and maintained in different species. Alternatively, it is possible that the  
2 discrepancy in numbers simply reflects that *cap*-derived sequences are less  
3 conserved and therefore harder to detect.

4 Curiously, it is rare for more than one C<sub>Ve</sub> to occur in the germline of any  
5 jawed vertebrate lineage. Carnivores are an obvious exception, since C<sub>Ve</sub> have been  
6 amplified to relatively high copy number (10-20 copies) in several carnivore lineages  
7 (**Figure 4**), apparently via retrotransposon-mediated duplication. Further investigation  
8 of how these C<sub>Ve</sub> have been amplified may reveal if their presence within an actively  
9 replicating retrotransposon lineage has impacted on the fixation of transposable  
10 elements derived from that lineage.

11

## 12 **Conclusions**

13 We identified the complete repertoire of C<sub>Ve</sub> sequences in published  
14 vertebrate genome assemblies. Through comparative analysis of these sequences,  
15 we provide the most complete picture yet of how viruses in the genus *Circovirus* have  
16 evolved and interacted with their hosts over the course of their evolution. The  
17 sequence-based resource implemented here can facilitate further characterisation of  
18 circovirus distribution, diversity and evolution as new C<sub>Ve</sub> and circovirus sequence  
19 data become available.

## 1 Acknowledgements

2 RJG was funded by the Medical Research Council of the United Kingdom  
3 (MC\_UU\_12014/12). WMS is supported by the Fundação de Amparo à Pesquisa do  
4 Estado de São Paulo, Brazil (Scholarships NO. 17/13981-0).

## 6 References

- 8 1. Li, L., et al., *Multiple diverse circoviruses infect farm animals and are*  
9 *commonly found in human and chimpanzee feces.* J Virol, 2010. **84**(4): p.  
10 1674-82.
- 11 2. Delwart, E. and L. Li, *Rapidly expanding genetic diversity and host range of*  
12 *the Circoviridae viral family and other Rep encoding small circular ssDNA*  
13 *genomes.* Virus Res, 2012. **164**(1-2): p. 114-21.
- 14 3. Amery-Gale, J., et al., *A high prevalence of beak and feather disease virus in*  
15 *non-psittacine Australian birds.* J Med Microbiol, 2017. **66**(7): p. 1005-1013.
- 16 4. Shulman, L.M. and I. Davidson, *Viruses with Circular Single-Stranded DNA*  
17 *Genomes Are Everywhere!* Annu Rev Virol, 2017. **4**(1): p. 159-180.
- 18 5. Holmes, E.C., *The evolution of endogenous viral elements.* Cell Host  
19 Microbe, 2011. **10**(4): p. 368-77.
- 20 6. Feschotte, C. and C. Gilbert, *Endogenous viruses: insights into viral evolution*  
21 *and impact on host biology.* Nat Rev Genet, 2012. **13**(4): p. 283-96.
- 22 7. Katzourakis, A. and R.J. Gifford, *Endogenous viral elements in animal*  
23 *genomes.* PLoS Genet, 2010. **6**(11): p. e1001191.
- 24 8. Belyi, V.A., A.J. Levine, and A.M. Skalka, *Sequences from ancestral single-*  
25 *stranded DNA viruses in vertebrate genomes: the parvoviridae and*  
26 *circoviridae are more than 40 to 50 million years old.* J Virol, 2010. **84**(23): p.  
27 12458-62.
- 28 9. Altschul, S.F., et al., *Gapped BLAST and PSI-BLAST: a new generation of*  
29 *protein database search programs.* Nuc. Acids Res., 1997. **25**: p. 3389-3402.
- 30 10. Edgar, R.C., *MUSCLE: multiple sequence alignment with high accuracy and*  
31 *high throughput.* Nucleic Acids Res, 2004. **32**(5): p. 1792-7.
- 32 11. Suyama, M., D. Torrents, and P. Bork, *PAL2NAL: robust conversion of*  
33 *protein sequence alignments into the corresponding codon alignments.*  
34 Nucleic Acids Res, 2006. **34**(Web Server issue): p. W609-12.
- 35 12. Rambaut, A., *SE-AL Sequence Alignment Editor.* 2002, University of Oxford:  
36 Oxford, UK.
- 37 13. Jarvis, E.D., et al., *Whole-genome analyses resolve early branches in the tree*  
38 *of life of modern birds.* Science, 2014. **346**(6215): p. 1320-31.
- 39 14. Muller, T. and M. Vingron, *Modeling amino acid replacement.* J Comput Biol,  
40 2000. **7**(6): p. 761-76.
- 41 15. Darriba, D., et al., *ProtTest 3: fast selection of best-fit models of protein*  
42 *evolution.* Bioinformatics, 2011. **27**(8): p. 1164-5.
- 43 16. Cui, J., et al., *Low frequency of paleoviral infiltration across the avian*  
44 *phylogeny.* Genome Biol, 2014. **15**(12): p. 539.
- 45 17. Lorincz, M., et al., *First detection and analysis of a fish circovirus.* J Gen Virol,  
46 2011. **92**(Pt 8): p. 1817-21.
- 47 18. Lorincz, M., et al., *Novel circovirus in European catfish (Silurus glanis).* Arch  
48 Virol, 2012. **157**(6): p. 1173-6.
- 49 19. Feher, E., et al., *Integrated circoviral rep-like sequences in the genome of*  
50 *cyprinid fish.* Virus Genes, 2013. **47**(2): p. 374-7.
- 51 20. Liu, H., et al., *Widespread horizontal gene transfer from circular single-*  
52 *stranded DNA viruses to eukaryotic genomes.* BMC Evol Biol, 2011. **11**: p.  
53 276.

- 1 21. Cannatella, D., *Xenopus in Space and Time: Fossils, Node Calibrations, Tip-*  
2 *Dating, and Paleobiogeography*. Cytogenet Genome Res, 2015. **145**(3-4): p.  
3 283-301.
- 4 22. Roelants, K., A. Haas, and F. Bossuyt, *Anuran radiations and the evolution of*  
5 *tadpole morphospace*. Proc Natl Acad Sci U S A, 2011. **108**(21): p. 8731-6.
- 6 23. Gilbert, C., et al., *Endogenous hepadnaviruses, bornaviruses and*  
7 *circoviruses in snakes*. Proc Biol Sci, 2014. **281**(1791): p. 20141122.
- 8 24. Jetz, W., et al., *The global diversity of birds in space and time*. Nature, 2012.  
9 **491**(7424): p. 444-8.
- 10 25. Prum, R.O., et al., *A comprehensive phylogeny of birds (Aves) using targeted*  
11 *next-generation DNA sequencing*. Nature, 2015. **526**(7574): p. 569-73.
- 12 26. Li, L., et al., *Circovirus in tissues of dogs with vasculitis and hemorrhage*.  
13 *Emerg Infect Dis*, 2013. **19**(4): p. 534-41.
- 14 27. Decaro, N., et al., *Genomic characterization of a circovirus associated with*  
15 *fatal hemorrhagic enteritis in dog, Italy*. PLoS One, 2014. **9**(8): p. e105909.
- 16 28. Wang, X., et al., *Cyprinid phylogeny based on Bayesian and maximum*  
17 *likelihood analyses of partitioned data: implications for Cyprinidae*  
18 *systematics*. Sci China Life Sci, 2012. **55**(9): p. 761-73.
- 19 29. Ren, Q. and R.L. Mayden, *Molecular phylogeny and biogeography of African*  
20 *diploid barbs, 'Barbus', and allies in Africa and Asia (Teleostei:*  
21 *Cypriniformes)*. Zoologica Scripta, 2016. **45**: p. 642–649.
- 22 30. Arriagada, G. and R.J. Gifford, *Parvovirus-derived endogenous viral elements*  
23 *in two South American rodent genomes*. J Virol, 2014. **88**(20): p. 12158-62.
- 24 31. Horie, M., et al., *An RNA-dependent RNA polymerase gene in bat genomes*  
25 *derived from an ancient negative-strand RNA virus*. Sci Rep, 2016. **6**: p.  
26 25873.  
27  
28

1 **Table 1. CVe detected in published vertebrate genome assemblies**

| EVE name                         | Reference  | Genes    | # Seqs | # Species |
|----------------------------------|------------|----------|--------|-----------|
| <b>Agnatha</b>                   |            |          |        |           |
| CVe- <i>Eptatretus</i> *         | This study | Rep      | 7      | 1         |
| <b>Bony Fish</b>                 |            |          |        |           |
| CVe- <i>Anguilla</i> *           | This study | Rep      |        | 1         |
| CVe- <i>Characiformes</i> *      | This study | Rep      |        | 1         |
| CVe- <i>Clupeiformes</i> *       | This study | Rep      |        | 1         |
| CVe- <i>Cypriniformes</i>        | [19]       | Rep-Cap  |        | 2         |
| CVe- <i>Cyprinodontiformes</i> * | This study | Rep      |        | 1         |
| CVe- <i>Perciformes</i> *        | This study | Rep      |        | 3         |
| CVe- <i>Salmoniformes</i> *      | This study | Rep      |        | 1         |
| <b>Amphibians</b>                |            |          |        |           |
| CVe- <i>Anura</i>                | [16]       | Rep      | 2      | 2         |
| <b>Reptiles</b>                  |            |          |        |           |
| CVe- <i>Viperidae</i>            | [23]       | Rep-Cap  | 16     | 6         |
| <b>Birds</b>                     |            |          |        |           |
| CVe- <i>Tinamou</i>              | [16]       | Rep-Cap  | 2      | 1         |
| CVe- <i>Psittaciformes</i>       | [16]       | Rep-Cap  | 4      | 3         |
| CVe- <i>Passeriformes</i>        | [16]       | Rep      | 7      | 5         |
| CVe- <i>Egretta</i>              | [16]       | Rep      | 1      | 1         |
| CVe- <i>Gallirallus</i> *        | This study | Rep      | 1      | 1         |
| CVe- <i>Picoides</i> *           | This study | Rep      | 1      | 1         |
| <b>Mammals</b>                   |            |          |        |           |
| CVe- <i>Chrysochloris</i> *      | This study | Rep, Cap | 3      | 1         |
| CVe- <i>Carnivora</i>            | [7]        | Rep      | 101    | 13        |
| CVe- <i>Mus.caroli</i> *         | This study | Rep      | 1      | 1         |
| CVe- <i>Heterocephalus</i> *     | This study | Rep      | 1      | 1         |
| CVe- <i>Phascolarctos</i> *      | This study | Rep      | 1      | 1         |
| CVe- <i>Sarcophilus</i> *        | This study | Rep      | 1      | 1         |
| CVe- <i>Monodelphis</i>          |            | Rep      | 1      | 1         |
| CVe- <i>Galeopterus</i> *        | This study | Rep      | 2      | 1         |
| CVe- <i>Manis</i> *              | This study | Rep      | 1      | 1         |
| CVe- <i>Choloepus</i> *          | This study | Cap      | 2      | 1         |
| Totals                           |            |          | 179    | 53        |

2  
3  
4

**Footnote:** Asterisks indicate newly identified CVe loci.

1 **Table 2. Vertebrate species with CVE**  
2

| Latin binomial                        | Common name               | EVE name                       | 1st. <sup>a</sup> | Copies <sup>b</sup> |
|---------------------------------------|---------------------------|--------------------------------|-------------------|---------------------|
| <b>Agnatha</b>                        |                           |                                |                   |                     |
| <i>Eptatretus burgeri</i>             | Inshore hagfish           | CVE- <i>Eptatretus</i> *       | x                 | 7                   |
| <b>Bony Fish</b>                      |                           |                                |                   |                     |
| <i>Anguilla anguilla</i>              | European eel              | CVE- <i>Anguilla</i>           | x                 | 1                   |
| <i>Pygocentrus nattereri</i>          | Red-bellied piranha       | CVE- <i>Characiformes</i>      |                   | 1                   |
| <i>Clupea harengus</i>                | Atlantic herring          | CVE- <i>Clupeiformes</i>       |                   | 1                   |
| <i>Cyprinus carpio</i>                | Common carp               | CVE- <i>Cypriniformes</i>      |                   | 4                   |
| <i>Sinocyclocheilus grahami</i>       | Golden-line barbel        | CVE- <i>Cypriniformes</i>      |                   | 2                   |
| <i>Kryptolebias brasiliensis</i>      | Killifish                 | CVE- <i>Cyprinodontiformes</i> | X                 | 4                   |
| <i>Micropterus floridanus</i>         | American black bass       | CVE- <i>Perciformes</i>        | X                 | 1                   |
| <i>Neolamprologus brichardi</i>       | Princess of Burundi       | CVE- <i>Perciformes</i>        | X                 | 2                   |
| <i>Acanthochromis polyacanthus</i>    | Spiny chromis damselfish  | CVE- <i>Perciformes</i>        | X                 | 5                   |
| <i>Salmo salar</i>                    | Atlantic salmon           | CVE- <i>Salmoniformes</i>      | X                 | 3                   |
| <b>Amphibians</b>                     |                           |                                |                   |                     |
| <i>Xenopus tropicalis</i>             | Western clawed frog       | CVE- <i>Xenopus</i>            |                   | 1                   |
| <i>Rana catesbeiana</i>               | American bullfrog         | CVE- <i>Rana</i>               | x                 | 1                   |
| <b>Reptiles</b>                       |                           |                                |                   |                     |
| <i>Pantherophis guttatus</i> *        | Corn snake                | CVE- <i>Viperidae</i>          |                   | 1                   |
| <i>Python molurus</i> *               | Indian python             | CVE- <i>Viperidae</i>          |                   | 1                   |
| <i>Crotalus horridus</i>              | Timber rattlesnake        | CVE- <i>Viperidae</i>          |                   | 1                   |
| <i>Crotalus mitchellii pyrrhus</i>    | Mitchell's rattlesnake    | CVE- <i>Viperidae</i>          |                   | 1                   |
| <i>Protobothrops mucrosquamatus</i> * | Brown spotted pit viper   | CVE- <i>Viperidae</i>          |                   | 1                   |
| <i>Ophiophagus hannah</i> **          | King cobra                | CVE- <i>Viperidae</i>          |                   | 1                   |
| <b>Birds</b>                          |                           |                                |                   |                     |
| <i>Serinus canaria</i> *              | Atlantic canary           | CVE- <i>Passeriformes</i>      |                   | 1                   |
| <i>Setophaga coronata</i> *           | Yellow-rumped warbler     | CVE- <i>Passeriformes</i>      |                   | 1                   |
| <i>Sporophila hypoxantha</i> *        | Lined seedeater           | CVE- <i>Passeriformes</i>      |                   | 1                   |
| <i>Zonotrichia albicollis</i> *       | White-throated sparrow    | CVE- <i>Passeriformes</i>      |                   | 1                   |
| <i>Geospiza fortis</i>                | Medium ground finch       | CVE- <i>Passeriformes</i>      |                   | 1                   |
| <i>Agapornis roseicollis</i> *        | Rosy-faced lovebird       | CVE- <i>Psittaciformes</i>     |                   | 1                   |
| <i>Amazona aestiva</i> *              | Turquoise-fronted amazon  | CVE- <i>Psittaciformes</i>     |                   | 2                   |
| <i>Nestor notabilis</i>               | Kea                       | CVE- <i>Psittaciformes</i>     |                   | 1                   |
| <i>Tinamus guttatus</i>               | White-throated tinamou    | CVE- <i>Tinamou</i>            |                   | 1                   |
| <i>Egretta garzetta</i>               | Little egret              | CVE- <i>Egretta</i>            |                   | 1                   |
| <i>Gallirallus okinawae</i> *         | Okinawa rail              | CVE- <i>Gallirallus</i>        | x                 | 1                   |
| <i>Picoides pubescens</i> *           | Downy woodpecker          | CVE- <i>Picoides</i>           | x                 | 1                   |
| <b>Mammals</b>                        |                           |                                |                   |                     |
| <i>Ailurus fulgens</i> *              | Red panda                 | CVE- <i>Carnivora</i>          |                   | 4                   |
| <i>Canis familiaris</i>               | Domestic dog              | CVE- <i>Carnivora</i>          |                   | 4                   |
| <i>Lycaon pictus</i> *                | Cape hunting dog          | CVE- <i>Carnivora</i>          |                   | 3                   |
| <i>Acinonyx jubatus</i> *             | Cheetah                   | CVE- <i>Carnivora</i>          |                   | 1                   |
| <i>Felis catus</i>                    | Domestic cat              | CVE- <i>Carnivora</i>          |                   | 3                   |
| <i>Panthera tigris altaica</i> *      | Siberian tiger            | CVE- <i>Carnivora</i>          |                   | 1                   |
| <i>Enhydra lutris</i> *               | Sea otter                 | CVE- <i>Carnivora</i>          |                   | 15                  |
| <i>Mustela putorius furo</i>          | Ferret                    | CVE- <i>Carnivora</i>          |                   | 32                  |
| <i>Odobenus rosmarus</i> *            | Walrus                    | CVE- <i>Carnivora</i>          |                   | 15                  |
| <i>Leptonychotes weddellii</i> *      | Weddell seal              | CVE- <i>Carnivora</i>          |                   | 4                   |
| <i>Neomonachus schauinslandi</i> *    | Monk seal                 | CVE- <i>Carnivora</i>          |                   | 11                  |
| <i>Ailuropoda melanoleuca</i>         | Panda                     | CVE- <i>Carnivora</i>          |                   | 7                   |
| <i>Ursus maritimus</i> *              | Polar bear                | CVE- <i>Carnivora</i>          |                   | 8                   |
| <i>Heterocephalus glaber</i> *        | Naked mole rat            | CVE- <i>Heterocephalus</i>     | x                 | 1                   |
| <i>Mus caroli</i> *                   | Ryuku mouse               | CVE- <i>Mus</i>                | x                 | 1                   |
| <i>Manis pentadactyla</i> *           | Chinese pangolin          | CVE- <i>Manis</i>              | x                 | 1                   |
| <i>Monodelphis domestica</i>          | Opossum                   | CVE- <i>Monodelphis</i>        |                   | 1                   |
| <i>Sarcophilus harrisii</i> *         | Tasmanian devil           | CVE- <i>Sarcophilus</i>        | x                 | 1                   |
| <i>Phascogaleos cinereus</i> *        | Koala                     | CVE- <i>Phascogaleos</i>       | x                 | 1                   |
| <i>Choloepus hoffmanni</i>            | Hoffmann's two-toed sloth | CVE- <i>Choloepus</i>          |                   | 2                   |
| <i>Galeopterus variegatus</i> *       | Sunda flying lemur        | CVE- <i>Galeopterus</i>        | x                 | 2                   |
| <i>Chrysochloris asiatica</i> *       | Cape golden mole          | CVE- <i>Chrysochloris</i>      | x                 | 3                   |

3 **Footnote:** Asterisks indicate newly identified circovirus EVEs.<sup>a</sup> CVE that provide the first evidence of  
4 circovirus infection in the host order in which they occur are marked with an 'x'.<sup>b</sup> Tandem repeated  
5 elements were considered to

1 **Figure Legends**

2

3

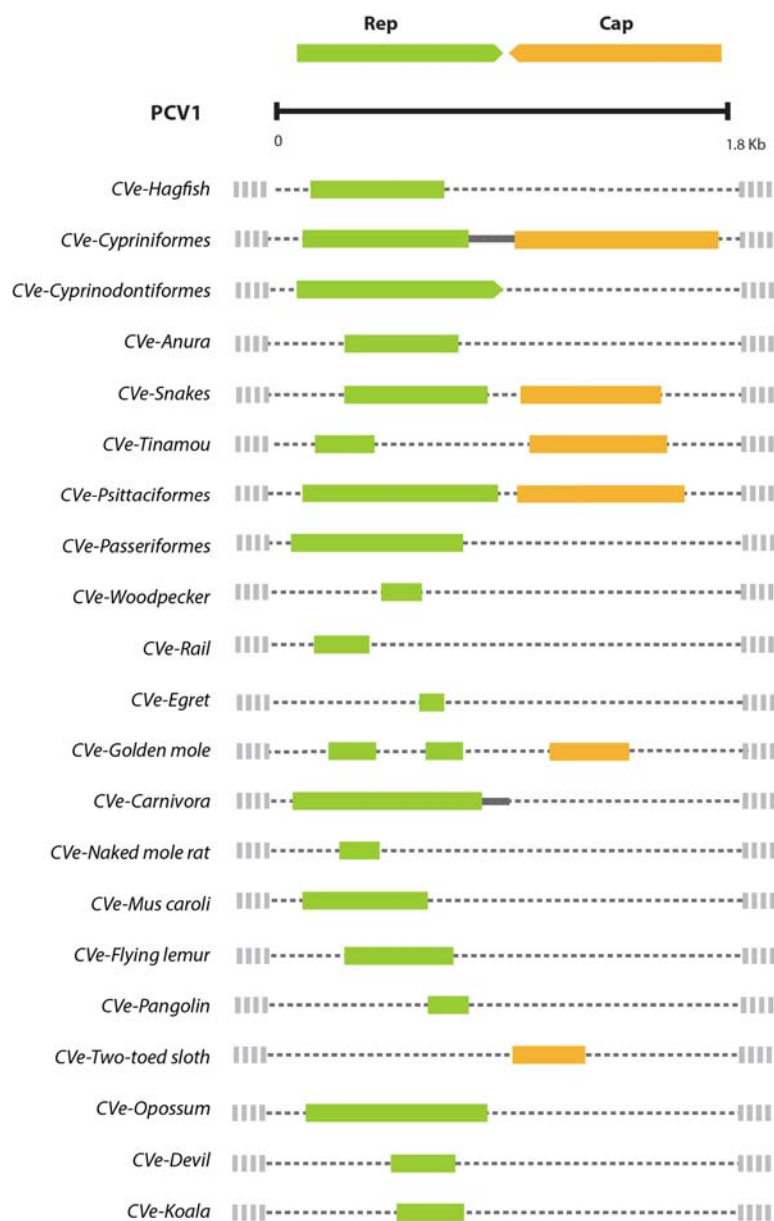

4

5

6 **Figure 1.** Genome structures of 21 endogenous circovirus (CVe) elements identified  
7 in vertebrate genomes. CVe coding sequences are represented schematically as  
8 green and yellow bars relative to a porcine circovirus 1 (PCV1) reference genome  
9 (accession # NC\_001792.2).



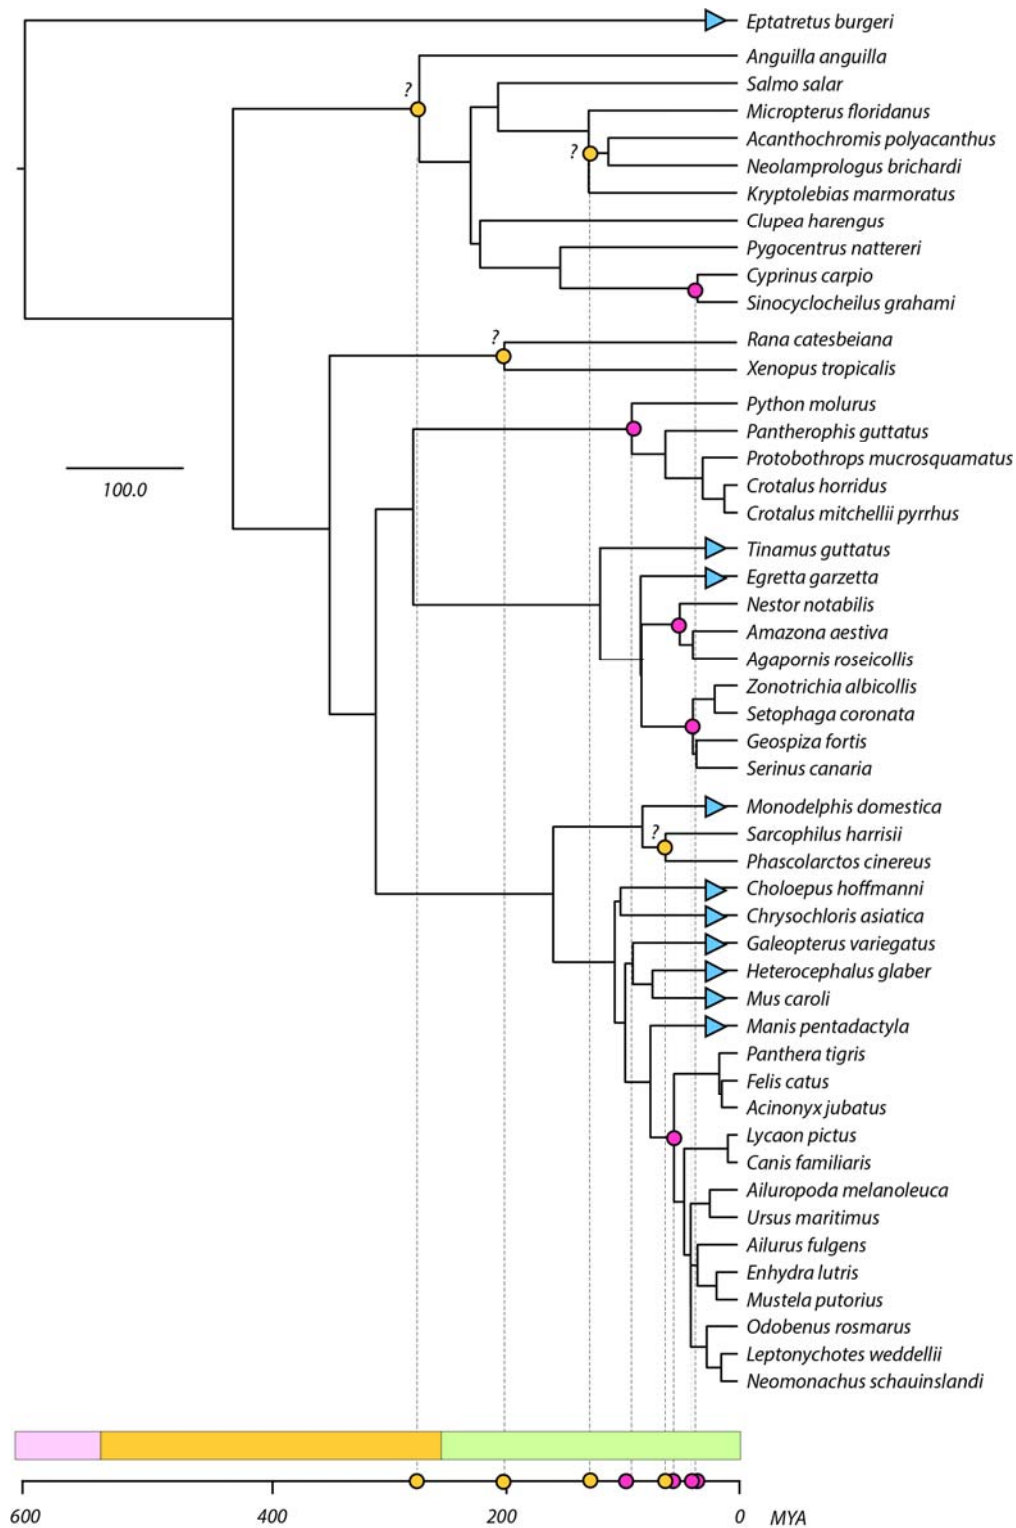

1  
2 **Figure 2.** Evolutionary relationships of vertebrate species in which Cve have been  
3 identified, and timeline of Cve evolution. Pink circles indicate confirmed orthologs.  
4 Yellow circles indicate the presence of potential orthologs that have not been  
5 confirmed. Blue triangles indicate where Cve loci are present, but no information  
6 about their ages could be obtained.

1

2 **Figure 3.** A maximum likelihood phylogeny showing estimated evolutionary

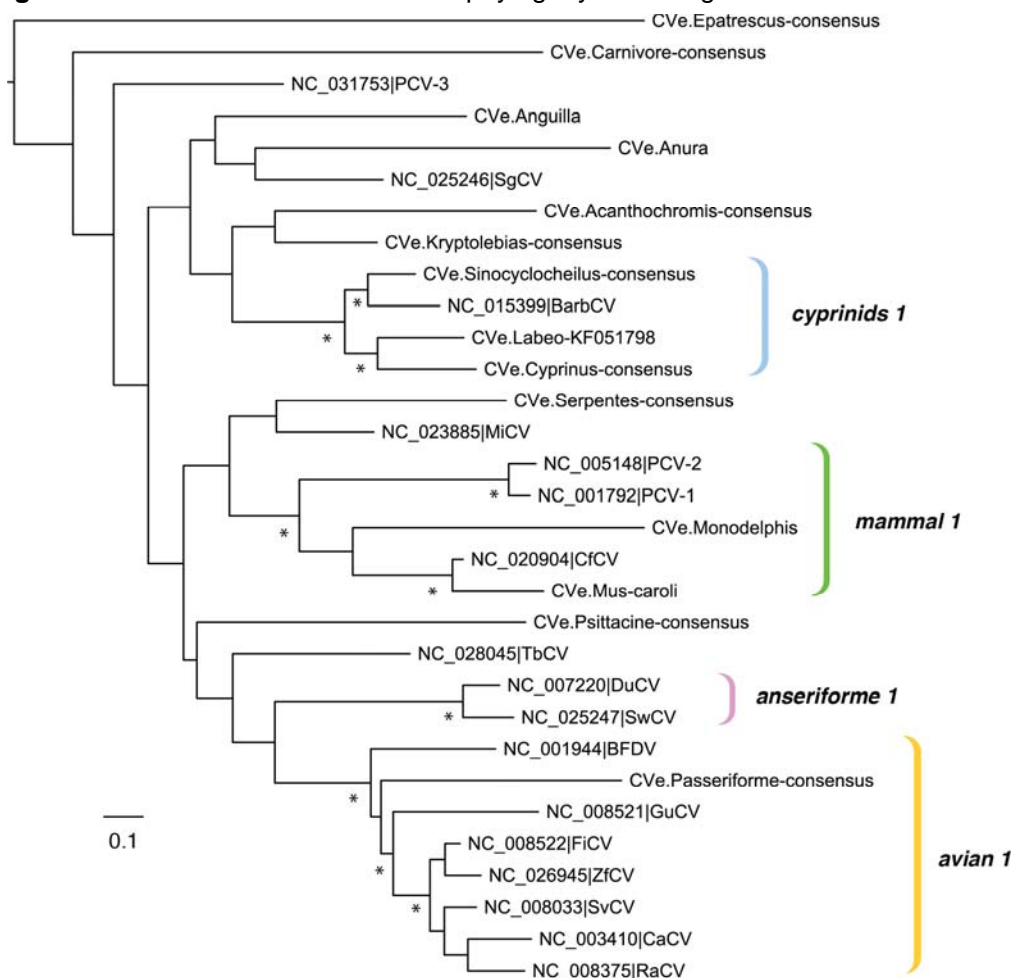

3 relationships between endogenous circovirus (CVe) elements and exogenous  
4 circoviruses. The phylogeny constructed from an alignment spanning ~200 amino  
5 acids in Rep. The scale bar shows evolutionary distance in substitutions per site.

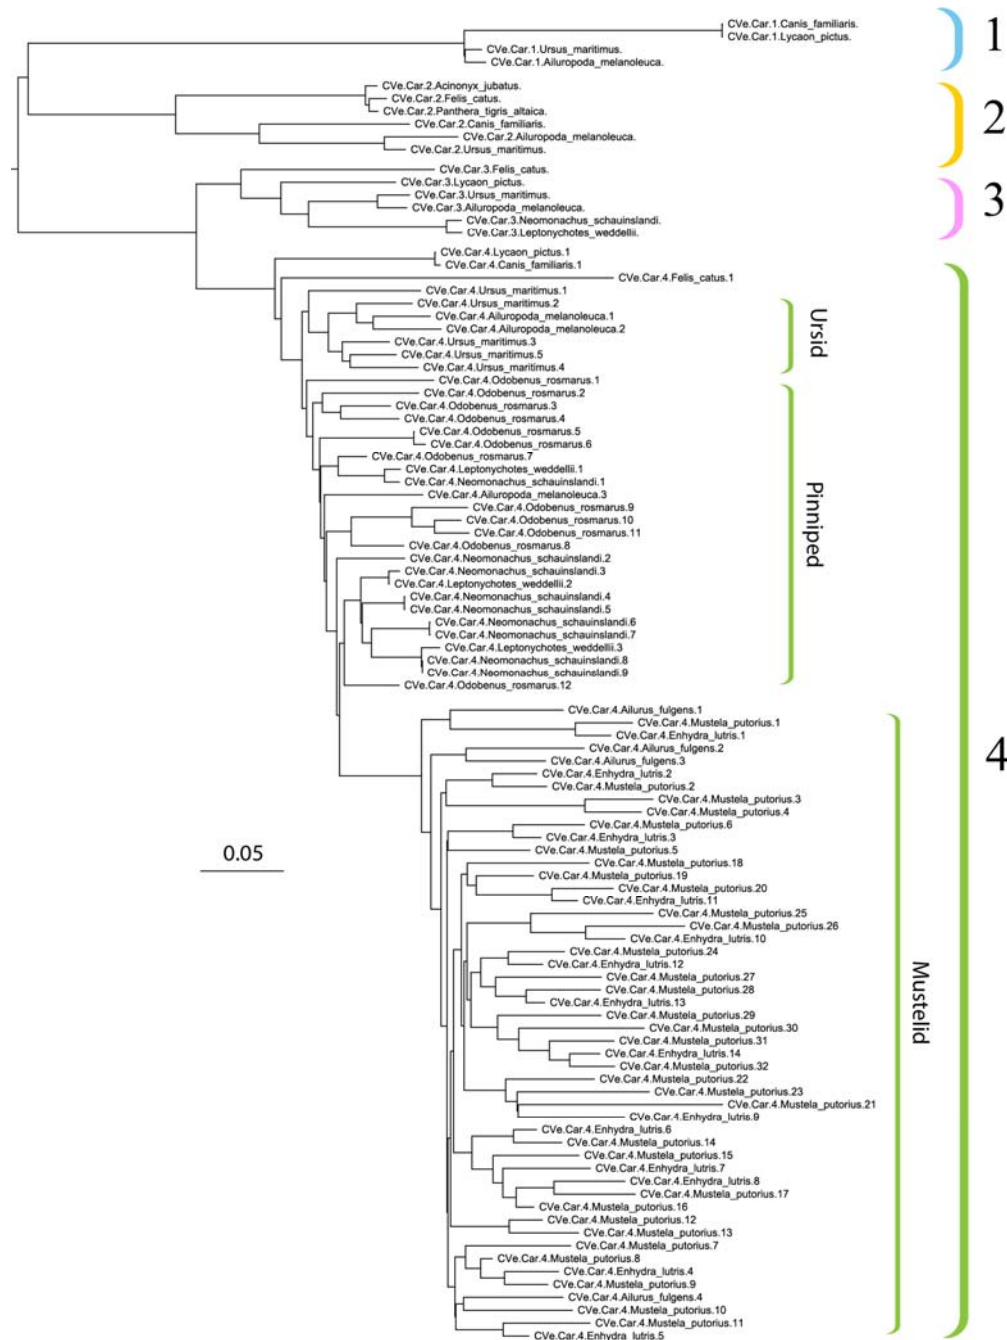

1  
2  
3  
4  
5  
6  
7  
8  
9

**Figure 4. Phylogeny of CVe sequences recovered from carnivore genome assemblies.** At least four distinct CVe loci are present in the carnivore germline (clades I-IV) as indicated by the coloured brackets. Within group IV, distinct copy number expansions appear to have occurred in ursids (bears), pinnipeds (seals and walrus), and mustelids. The scale bar shows evolutionary distance in substitutions per site. The tree is midpoint rooted for display purposes.
